# Supplementary material for: Timing of chemotherapy-induced neutropenia: the prognostic factor in advanced pancreatic cancer patients treated with gemcitabine / gemcitabine-based chemotherapy
Source: PubMed Central journal article supplement (PMC5630440; doi:10.18632/oncotarget.16980), 2017-04-09
Supplement: oncotarget-08-61404-s001.pdf [file oncotarget-08-61404-s001.pdf]

# Timing of chemotherapy-induced neutropenia: the prognostic factor in advanced pancreatic cancer patients treated with gemcitabine / gemcitabine-based chemotherapy

## Supplementary Material

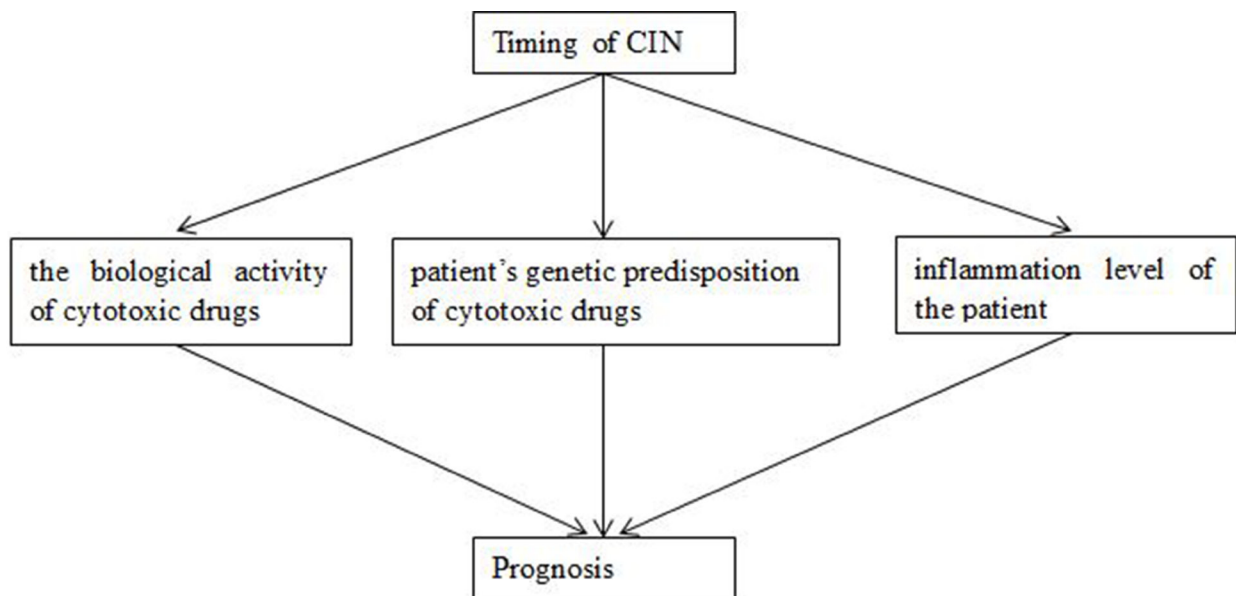

Supplementary Figure 1: Potential mechanisms for timing of CIN as a prognosis factor
